# Supplementary material for: Pain reduction due to novel sensory-motor training in Complex Regional Pain Syndrome I – A pilot study
Source: publisher site journal article supplement (doi:10.1016/j.sjpain.2016.11.003), 2016-12-09
Supplement: Supplementary file 1 [file 1-s2.0-S187788601630132X-mmc1.pdf]

## Supplementary Material 2

### Instructions given to the participants:

- First the patients were introduced to the training by showing them the training discs and having them try out to identify the pattern with the index finger of their unaffected hand, while seeing the pattern.
- We then presented the different patterns (figure 1 D) and had the patient try out to identify, still with the unaffected hand, all the different patterns.
- Further we let the patients identify the differences between the “easier” (further apart) and the “more difficult” (closer together) discs (figure 1E).
- After this familiarization with the training discs, the different modes of ST training were explained starting with the both-handed training.
- We suggested to the patients to start out with the both-handed training, if they feel comfortable in identifying the patterns with their affected hand, they should add the time training and as a last step also use the memory training.
- The patients were instructed to train first with the easier discs and take the more difficult ones in addition as soon as they feel comfortable. Using also the different training modes.
- Further the participants were instructed to train on a regular basis and if possible perform the training each day.
- The patients further were introduced in how they are to use their training- and pain diaries.
